# Supplementary material for: Early-Life Slow Enteral Feeding Progression Pattern Is Associated with Longitudinal Head-Size Growth Faltering and Neurodevelopmental Impairment Outcomes in Extremely Preterm Infants
Source: MDPI journal article supplement (doi:10.3390/nu15051277), 2023-03-04
Supplement: s1 [file s1]

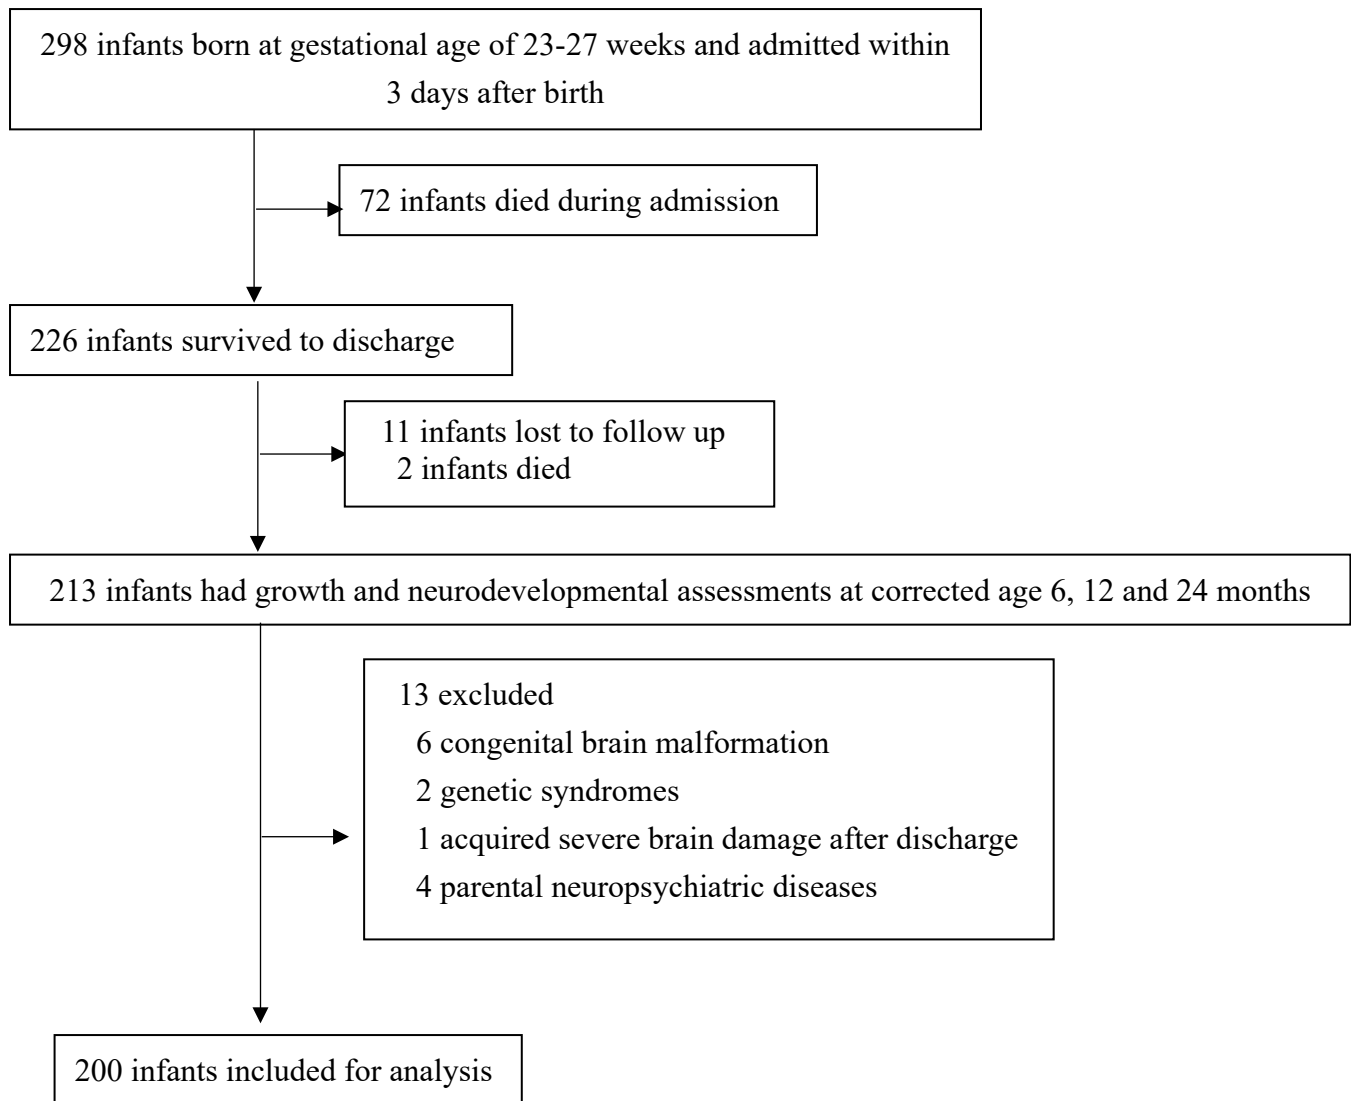

**Supplemental Figure S1.** A flowchart of the extremely preterm infants included for analysis.

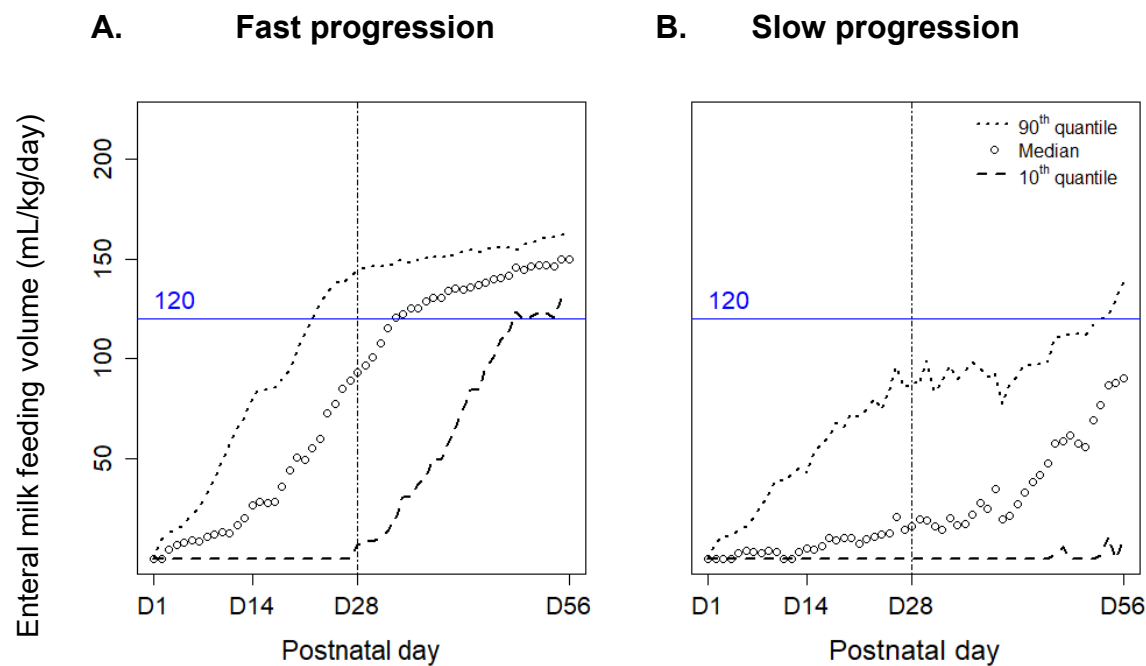

**Supplemental Figure S2.** The kmlShape clustering analysis characterizes the feeding progression trajectories of extremely preterm infants (N=200) based on the daily median volume of enteral milk feeding volume (mL/kg/day) in the first 56 postnatal days as fast progression pattern (n=131, **A**) and slow progression (n=69, **B**) feeding pattern. The feeding volume data were presented as the median and the 90th and 10th quantiles, and full enteral volume was defined as 120 mL/kg/day.

**Supplemental Table S1.** The early-life medical risks and slow feeding progression pattern that associated with the trend changes of head circumference z scores from birth to 24 months of corrected age in extremely preterm infants: univariate and multivariate of GEE analyses

| Feeding Trajectories                          | Univariate  |                |          | Multivariate |                |          |
|-----------------------------------------------|-------------|----------------|----------|--------------|----------------|----------|
|                                               | Coefficient | 95% CI         | P values | Coefficient  | 95% CI         | P values |
| <b>Demographics</b>                           |             |                |          |              |                |          |
| Gestational age, weeks                        | 0.288       | 0.187, 0.388   | <0.001   | 0.216        | 0.106, 0.325   | <0.001   |
| Female (ref. male)                            | 0.189       | -0.089, 0.466  | 0.182    | 0.001        | -0.225, 0.226  | 0.994    |
| Small for gestational age                     | -1.418      | -1.820, -1.016 | <0.001   | -1.142       | -1.577, -0.706 | <0.001   |
| Preeclampsia                                  | -0.399      | -0.762, -0.037 | 0.031    | -0.210       | -0.553, 0.133  | 0.231    |
| Maternal education level (< college)          | -0.057      | -0.342, 0.228  | 0.694    |              |                |          |
| <b>Pulmonary/Hemodynamics</b>                 |             |                |          |              |                |          |
| RDS requiring surfactant therapy              | -0.593      | -0.861, -0.325 | <0.001   | -0.339       | -0.574, -0.104 | 0.005    |
| <b>Infection events</b>                       |             |                |          |              |                |          |
| Late-onset sepsis                             | -0.306      | -0.640, 0.028  | 0.072    | 0.278        | -0.017, 0.573  | 0.065    |
| Severe brain injury                           | -0.985      | -1.409, -0.560 | <0.001   | -0.591       | -1.014, -0.168 | 0.006    |
| Slow feeding progression pattern, (ref. fast) | -0.663      | -0.963, -0.364 | <0.001   | -0.638       | -0.884, -0.394 | <0.001   |

GEE: generalized estimating equations
